# Supplementary material for: Causal relationship between telomere length and risk of intracranial aneurysm: a bidirectional Mendelian randomization study
Source: Front Neurol. 2024 Mar 11;15:1355895. doi: 10.3389/fneur.2024.1355895 (PMC10964484; doi:10.3389/fneur.2024.1355895)
Supplement: Supplementary file 3 [file Table_1.XLSX]

## Sheet: 筛选SNP补充表1
Supplementary Table 1. Characteristics of instrumental variables associated with telomere length (P < 5×10-8)
Exposure	SNP	Chr	Position (37/38)	A1	A2	A1_freq	Beta	SE	P-value
telomere length	rs3767952	1	41231032	A	G	0.23	0.013	0.002	1.8e-08
telomere length	rs4498805	1	110910397	T	G	0.55	0.015	0.002	5.7e-14
telomere length	rs932002	1	226577306	C	T	0.85	0.04	0.003	7.3e-47
telomere length	rs66731853	1	20916238	G	A	0.68	0.018	0.002	1.5e-16
telomere length	rs11584821	1	114419489	C	T	0.82	0.031	0.003	3e-31
telomere length	rs6659669	1	185315067	C	T	0.39	0.012	0.002	1.1e-08
telomere length	rs2977608	1	768253	C	A	0.74	0.013	0.002	3e-08
telomere length	rs6669563	1	32279629	A	G	0.44	0.018	0.002	2.1e-19
telomere length	rs145114957	1	94322469	G	C	0.04	0.027	0.005	4.6e-08
telomere length	rs41269079	1	45252015	A	T	0.19	0.015	0.003	1.7e-09
telomere length	rs139795227	1	92842367	C	A	0.01	0.06	0.009	6.7e-12
telomere length	rs11579626	1	146741960	C	A	0.08	0.027	0.004	1.3e-13
telomere length	rs6587577	1	151402045	A	G	0.17	0.018	0.003	4.8e-12
telomere length	rs6751209	2	43588302	T	C	0.8	0.014	0.002	1.6e-08
telomere length	rs188918174	2	54473646	T	C	0.04	0.04	0.005	1.2e-13
telomere length	rs56178008	2	29098543	A	T	0.44	0.014	0.002	9.7e-13
telomere length	rs17803849	2	210673445	T	C	0.41	0.027	0.002	4.2e-41
telomere length	rs2555104	2	17841243	A	C	0.57	0.014	0.002	6.6e-12
telomere length	rs77732866	2	58979879	A	G	0.14	0.018	0.003	9.2e-10
telomere length	rs2230590	3	49936102	T	C	0.49	0.016	0.002	3.6e-15
telomere length	rs78491606	3	72891547	A	C	0.98	0.076	0.007	1.9e-24
telomere length	rs9878436	3	138244400	C	T	0.57	0.014	0.002	1.2e-12
telomere length	rs35446936	3	169486508	G	A	0.76	0.094	0.002	1e-200
telomere length	rs112394943	3	197842892	T	C	0.84	0.02	0.003	1.6e-12
telomere length	rs13062095	3	101267385	C	T	0.33	0.014	0.002	9.7e-11
telomere length	rs4616688	3	160042459	G	T	0.47	0.017	0.002	4.5e-18
telomere length	rs6790988	3	170263320	G	A	0.74	0.015	0.002	1.8e-10
telomere length	rs869785	3	24347800	T	C	0.33	0.015	0.002	4.4e-12
telomere length	rs6776756	3	128215821	G	A	0.4	0.017	0.002	1.1e-17
telomere length	rs10805346	4	9920347	C	T	0.44	0.012	0.002	7e-09
telomere length	rs6536702	4	164028105	A	G	0.77	0.053	0.002	9.4e-111
telomere length	rs871134	4	7044380	C	T	0.43	0.018	0.002	1.7e-19
telomere length	rs4695407	4	48843372	G	A	0.51	0.014	0.002	1.5e-12
telomere length	rs2282764	4	2255063	A	G	0.86	0.022	0.003	9.3e-15
telomere length	rs7705526	5	1285974	A	C	0.33	0.078	0.002	1e-200
telomere length	rs73730598	5	77973	A	G	0.05	0.027	0.004	4.7e-10
telomere length	rs61748181	5	1294166	C	T	0.97	0.059	0.006	2.8e-23
telomere length	rs6881568	5	1670265	A	C	0.36	0.017	0.002	3.7e-16
telomere length	rs55747751	5	132397351	G	A	0.92	0.021	0.004	1.7e-08
telomere length	rs185174247	5	138914024	A	G	0.06	0.037	0.004	1.1e-17
telomere length	rs28363070	5	1415068	A	G	0.01	0.076	0.01	3.5e-15
telomere length	rs7772289	6	28674322	T	G	0.5	0.018	0.002	1.7e-18
telomere length	rs2763979	6	31794592	C	T	0.64	0.028	0.002	1.3e-40
telomere length	rs80324517	6	204031	A	G	0.05	0.04	0.005	1.8e-17
telomere length	rs9398196	6	109601554	A	G	0.48	0.014	0.002	9.5e-13
telomere length	rs61405042	7	67200	C	T	0.97	0.05	0.006	8.5e-17
telomere length	rs117407747	7	159117178	T	C	0.03	0.045	0.006	1.8e-13
telomere length	rs1985369	7	159119220	A	G	0.13	0.031	0.003	3.6e-25
telomere length	rs13230646	7	23930316	T	C	0.75	0.017	0.002	8.9e-14
telomere length	rs11769630	7	50257703	T	A	0.93	0.026	0.004	4.3e-11
telomere length	rs2056726	7	99780283	G	A	0.79	0.023	0.002	7.9e-21
telomere length	rs7790856	7	124459852	C	T	0.71	0.044	0.002	1.8e-87
telomere length	rs4731541	7	128678236	C	G	0.38	0.021	0.002	1.4e-23
telomere length	rs117630647	7	124779510	A	G	0.02	0.06	0.007	1.4e-16
telomere length	rs2306646	8	21846586	G	C	0.44	0.021	0.002	3.3e-25
telomere length	rs762679	8	48885436	A	T	0.86	0.031	0.003	1.4e-27
telomere length	rs11991877	8	56664524	T	A	0.11	0.03	0.003	3.2e-21
telomere length	rs10112752	8	73958718	G	A	0.57	0.029	0.002	9.5e-46
telomere length	rs1023767	8	95530969	G	A	0.76	0.018	0.002	5e-15
telomere length	rs11557154	9	34107505	C	T	0.87	0.034	0.003	1.1e-30
telomere length	rs4743037	9	109639970	T	C	0.23	0.015	0.002	5.1e-10
telomere length	rs117034449	10	103855348	A	G	0.02	0.037	0.007	2.1e-08
telomere length	rs7099229	10	96134685	G	A	0.73	0.015	0.002	8.4e-12
telomere length	rs12412214	10	101276256	G	A	0.72	0.025	0.002	3.4e-28
telomere length	rs6584579	10	105645725	G	A	0.4	0.011	0.002	2e-08
telomere length	rs9419958	10	105675946	T	C	0.14	0.081	0.003	2.6e-167
telomere length	rs77231040	10	106280527	C	G	0.01	0.099	0.013	2e-13
telomere length	rs10905255	10	5870267	G	T	0.42	0.018	0.002	2.6e-19
telomere length	rs939916	11	202253	A	G	0.67	0.024	0.002	6.6e-29
telomere length	rs10840270	11	9629553	G	C	0.66	0.014	0.002	1.3e-11
telomere length	rs2293579	11	47440758	G	A	0.61	0.013	0.002	3.3e-10
telomere length	rs10768683	11	5247791	G	C	0.84	0.047	0.003	1.5e-64
telomere length	rs11212631	11	108304509	T	C	0.8	0.019	0.003	4.7e-14
telomere length	rs6590343	11	128500215	G	A	0.52	0.012	0.002	1.5e-09
telomere length	rs611646	11	108177097	T	A	0.59	0.037	0.002	3.5e-73
telomere length	rs12369950	12	24762109	T	C	0.86	0.018	0.003	8e-10
telomere length	rs10773176	12	122944713	A	G	0.26	0.017	0.002	5.2e-14
telomere length	rs10845387	12	11757743	G	A	0.65	0.014	0.002	1.5e-11
telomere length	rs17445108	12	57082058	G	A	0.87	0.017	0.003	2e-08
telomere length	rs10774624	12	111833788	A	G	0.53	0.015	0.002	2.9e-13
telomere length	rs1907702	12	88955469	A	G	0.77	0.015	0.002	5.9e-10
telomere length	rs76666449	12	120904895	C	T	0.1	0.03	0.003	8.2e-19
telomere length	rs28577594	12	123895906	C	G	0.71	0.019	0.002	5.4e-17
telomere length	rs1332941	13	41695100	G	A	0.82	0.026	0.003	5.9e-21
telomere length	rs670180	13	71236611	T	A	0.43	0.012	0.002	1.2e-08
telomere length	rs9600019	13	73317585	T	C	0.34	0.013	0.002	2.4e-09
telomere length	rs73581419	14	21941148	T	C	0.11	0.023	0.003	1.3e-12
telomere length	rs113525195	14	23499321	C	A	0.71	0.012	0.002	3.1e-08
telomere length	rs45604339	14	65543102	C	T	0.66	0.02	0.002	4.3e-22
telomere length	rs137901416	14	73418095	A	G	0.1	0.046	0.003	4.7e-43
telomere length	rs1957937	14	96181360	T	A	0.16	0.021	0.003	1.9e-14
telomere length	rs3093888	14	20812951	G	A	0.95	0.029	0.005	1.5e-10
telomere length	rs17677991	15	42032383	G	C	0.34	0.022	0.002	4.4e-26
telomere length	rs5742915	15	74336633	C	T	0.45	0.019	0.002	1.6e-21
telomere length	rs7164950	15	56775385	G	A	0.41	0.013	0.002	2.3e-10
telomere length	rs76219171	16	50188929	A	G	0.06	0.036	0.004	7.8e-17
telomere length	rs2967355	16	82200103	A	C	0.23	0.046	0.002	4e-83
telomere length	rs12925933	16	90141355	A	C	0.34	0.015	0.002	7e-12
telomere length	rs111950327	16	48283993	C	G	0.06	0.024	0.004	5.9e-09
telomere length	rs450962	16	28413517	G	A	0.28	0.014	0.002	5.9e-09
telomere length	rs3785074	16	69406986	G	A	0.29	0.024	0.002	2.6e-27
telomere length	rs76065543	16	74678063	T	C	0.14	0.034	0.003	4.2e-32
telomere length	rs12932179	16	9072085	A	G	0.44	0.014	0.002	1.8e-11
telomere length	rs182059586	16	14652220	T	C	0.97	0.057	0.007	4.9e-17
telomere length	rs11117354	16	88092092	C	T	0.7	0.023	0.002	3.4e-26
telomere length	rs56061761	16	70187811	G	A	0.67	0.02	0.002	6.9e-20
telomere length	rs4724	17	7760397	G	A	0.88	0.055	0.003	9.8e-69
telomere length	rs12451892	17	2247982	T	C	0.62	0.012	0.002	2.2e-08
telomere length	rs7209057	17	65705530	A	G	0.56	0.012	0.002	5.7e-09
telomere length	rs59409453	17	1666218	G	A	0.73	0.02	0.002	1.6e-18
telomere length	rs111527438	17	29252703	C	T	0.35	0.013	0.002	3.1e-09
telomere length	rs7221585	17	76195153	T	C	0.22	0.014	0.002	6.7e-09
telomere length	rs75664430	17	8064779	C	G	0.75	0.024	0.002	3.6e-24
telomere length	rs56799554	17	41456413	A	G	0.83	0.026	0.003	3e-22
telomere length	rs144204502	17	76183233	C	T	0.99	0.101	0.009	3.4e-28
telomere length	rs150150565	18	708207	T	C	0.02	0.064	0.007	6.8e-18
telomere length	rs116863223	18	709396	G	A	0.99	0.082	0.009	2.6e-18
telomere length	rs16978028	18	42070981	A	T	0.86	0.03	0.003	8.2e-26
telomere length	rs2276182	18	51798047	G	C	0.4	0.023	0.002	2.8e-30
telomere length	rs9955360	18	78008334	C	A	0.13	0.019	0.003	2.2e-10
telomere length	rs3891167	18	658423	A	G	0.75	0.043	0.002	1.2e-70
telomere length	rs139669835	18	729871	C	T	0.99	0.061	0.011	6.1e-09
telomere length	rs11085072	19	4368142	C	T	0.76	0.013	0.002	2.6e-08
telomere length	rs4530278	19	33752994	T	G	0.6	0.014	0.002	1.5e-11
telomere length	rs8105767	19	22215441	G	A	0.29	0.033	0.002	2.5e-50
telomere length	rs429358	19	45411941	C	T	0.15	0.017	0.003	3.8e-10
telomere length	rs8102497	19	57370055	G	A	0.57	0.015	0.002	1.4e-13
telomere length	rs11699829	20	62157200	A	G	0.03	0.064	0.006	1.5e-26
telomere length	rs142426306	20	62488152	C	T	0.96	0.05	0.005	8.7e-21
telomere length	rs1291143	20	35525640	C	A	0.85	0.049	0.003	1.8e-69
telomere length	rs6054257	20	66370	G	A	0.21	0.014	0.002	1.1e-08
telomere length	rs35640778	20	62321128	G	A	0.98	0.209	0.007	9.59e-195
telomere length	rs143190905	20	62291767	G	T	0.92	0.072	0.004	1.6e-85
telomere length	rs41304832	20	62375508	A	G	0.01	0.061	0.009	5e-11
telomere length	rs117512405	20	62574274	G	A	0.98	0.079	0.008	9.5e-22
telomere length	rs28502153	22	17469049	C	A	0.62	0.022	0.002	1.2e-25
telomere length	rs6007020	22	45790132	C	T	0.37	0.014	0.002	4.8e-12
telomere length	rs1003322	22	51072289	A	C	0.21	0.014	0.002	1e-08
Abbreviation: SNP: single-nucleotide polymorphism; A1: effect allele; A2: the other allele; A1_freq: the frequency of A1, or effect allele frequency; SE: standard error.
