# Supplementary material for: Causal relationship between telomere length and risk of intracranial aneurysm: a bidirectional Mendelian randomization study
Source: Front Neurol. 2024 Mar 11;15:1355895. doi: 10.3389/fneur.2024.1355895 (PMC10964484; doi:10.3389/fneur.2024.1355895)
Supplement: Supplementary file 4 [file Table_2.XLSX]

## Sheet: Sheet1
Supplementary Table 2. Characteristics of instrumental variables associated with intracranial aneurysm in the telomere length.
SNP	Telomere Length			Intracranial Aneurysm			Remove
	BETA	SE	P-value	BETA	SE	P-value
rs1003322	0.0141734	0.00247546	1e-08	-0.0091	0.0289	0.7528
rs10112752	0.0287522	0.00202518	9.49948e-46	-0.0163	0.0212	0.4419
rs1023767	0.0183732	0.00234772	5.00035e-15	-0.0177	0.0217	0.4136
rs10805346	0.0117072	0.00202147	7.00003e-09	-0.01	0.0207	0.6303
rs113525195	0.0124075	0.00224132	3.09999e-08	-0.0063	0.0249	0.8006
rs11557154	0.0343719	0.00298538	1.10002e-30	-0.0126	0.0354	0.7215
rs11579626	0.0265113	0.00357752	1.29987e-13	-0.037	0.0391	0.3441
rs12369950	0.0178308	0.00290205	8e-10	0.018	0.0327	0.5814
rs12925933	0.0146622	0.00213796	7.00003e-12	-0.0109	0.0198	0.5818
rs12932179	0.0136257	0.0020276	1.80011e-11	-0.0083	0.0247	0.7377
rs13230646	0.0173277	0.00232377	8.9002e-14	-0.0088	0.0223	0.692
rs144204502	0.100574	0.00913369	3.40017e-28	-0.1316	0.089	0.1392
rs17803849	0.0273203	0.00203482	4.19952e-41	0.0215	0.0225	0.3401
rs2056726	0.0228078	0.00243638	7.89951e-21	0.0297	0.0273	0.276
rs2282764	0.0224234	0.00289392	9.30037e-15	-0.0496	0.0327	0.1296
rs2555104	0.0139717	0.00203498	6.59933e-12	0.0298	0.0221	0.178
rs3093888	0.028973	0.00452459	1.5e-10	0.0115	0.0414	0.7805
rs35446936	0.0940025	0.00232918	1e-200	0.0108	0.0221	0.6236	remove
rs3785074	0.023863	0.00220455	2.60016e-27	-0.0325	0.0228	0.1539
rs4498805	0.0150601	0.00200376	5.70033e-14	-0.0136	0.0221	0.5383
rs45604339	0.020433	0.00211433	4.30031e-22	-0.0239	0.0218	0.2724
rs4724	0.0547446	0.00312441	9.79941e-69	-0.0341	0.0355	0.3366
rs4743037	0.0147971	0.00238094	5.1e-10	-0.0474	0.0226	0.0362
rs5742915	0.0193377	0.00202886	1.59993e-21	-0.0173	0.0216	0.4234
rs6007020	0.0144904	0.00209637	4.79954e-12	-0.005	0.0234	0.8305
rs6584579	0.0114923	0.00204674	2e-08	-0.0452	0.0215	0.03531
rs6590343	0.0121739	0.00201444	1.5e-09	-0.0116	0.0201	0.5646
rs6659669	0.0117091	0.00205167	1.09999e-08	-0.0029	0.0225	0.8976
rs6669563	0.0182358	0.00202476	2.09991e-19	-0.0336	0.0241	0.1625
rs66731853	0.0177791	0.00215421	1.50003e-16	-0.0178	0.0228	0.4361
rs6751209	0.0140465	0.00248465	1.6e-08	-0.0308	0.0235	0.1904
rs6776756	0.0174439	0.00203747	1.10002e-17	-0.0141	0.0226	0.534
rs6790988	0.0145728	0.00228428	1.79999e-10	-0.049	0.0252	0.05188
rs6881568	0.0169256	0.00207735	3.69999e-16	0.0159	0.0235	0.4985
rs7099229	0.0153288	0.00224403	8.4004e-12	0.0294	0.0273	0.2808
rs7164950	0.0129362	0.00204001	2.30001e-10	0.0125	0.0229	0.5852
rs7209057	0.011819	0.00202865	5.69994e-09	-0.0031	0.0245	0.9003
rs73581419	0.0229838	0.00324156	1.29987e-12	0.006	0.0398	0.8802
rs76065543	0.0342843	0.00290708	4.19952e-32	-0.0075	0.0315	0.8109
rs76666449	0.0295125	0.00333186	8.19974e-19	-0.0258	0.0345	0.4551
rs77732866	0.0177942	0.00290595	9.20005e-10	0.0447	0.0283	0.1146
rs7790856	0.0437199	0.00220526	1.80011e-87	-0.0151	0.0225	0.501
rs869785	0.0147303	0.00212801	4.40048e-12	0.0145	0.0201	0.4702
rs871134	0.0182986	0.0020263	1.69981e-19	0.0143	0.0232	0.538
rs932002	0.0402052	0.00279667	7.29962e-47	0.0031	0.0276	0.9111
rs9398196	0.0143586	0.00201175	9.49948e-13	0.004	0.0224	0.8569
rs9419958	0.0810098	0.00293847	2.60016e-167	-0.0692	0.0303	0.02244	remove
rs9600019	0.0127134	0.00213096	2.39999e-09	-0.0372	0.0236	0.1143
rs9878436	0.0143407	0.00201819	1.20005e-12	0.0353	0.0226	0.1175
Abbreviation: SNP: single-nucleotide polymorphism; SE: standard error.
