# Supplementary material for: Causal relationship between telomere length and risk of intracranial aneurysm: a bidirectional Mendelian randomization study
Source: Front Neurol. 2024 Mar 11;15:1355895. doi: 10.3389/fneur.2024.1355895 (PMC10964484; doi:10.3389/fneur.2024.1355895)
Supplement: Supplementary file 6 [file Table_4.XLSX]

## Sheet: Sheet1
Supplementary Table 2. Characteristics of instrumental variables associated with telomere length in the intracranial aneurysm.
SNP	Intracranial Aneurysm			Telomere Length
	BETA	SE	P-value	BETA	SE	P-value
rs11661542	0.1659	0.0205	5.735e-16	0.00122576	0.00201542	0.54
rs12310399	0.1383	0.0198	3.252e-12	0.00313312	0.00207464	0.13
rs1537373	0.1864	0.0192	2.595e-22	0.00118441	0.00201562	0.56
rs3742321	0.1475	0.0223	4.103e-11	0.0004243	0.0024	0.86
rs39713	0.1823	0.0332	4.101e-08	0.00421447	0.00349959	0.23
rs55965782	0.2644	0.0308	9.032e-18	0.00310704	0.00282814	0.27
rs6997005	0.1489	0.0193	1.259e-14	-0.00168012	0.00203684	0.41
Abbreviation: SNP: single-nucleotide polymorphism; SE: standard error.
