# Supplementary material for: Causal relationship between telomere length and risk of intracranial aneurysm: a bidirectional Mendelian randomization study
Source: Front Neurol. 2024 Mar 11;15:1355895. doi: 10.3389/fneur.2024.1355895 (PMC10964484; doi:10.3389/fneur.2024.1355895)
Supplement: Supplementary file 7 [file Table_5.XLSX]

## Sheet: Sheet1
Supplementary Table 5. Overview of the samples of the GWAS statistics for intracranial aneurysms and telomere length.
intracranial aneurysms						telomere length
Cohort	Stratum	Cases	Controls	Sample size		Cohort	Dataset	Sample size
@neurIST	sCEU	325	3043	3368		UK Biobank	ieu-b-4879	472174
Busselton
NBS
French Canadian	sFC	162	1715	1877
Finland (EGA)	sFIN	746	3864	4610
Finland
NFBC1966
ICAN	sFRA	783	2629	3412
PREGO
Utrecht 1	sNL1	645	721	1366
Netherlands (EGA)
Utrecht 2	sNL2	812	3152	3964
Doetinchem Cohort Study
Project MinE
Poland	sPOL	454	431	885
GOSH controls	sUK1	772	3236	4008
GOSH cases
NBS+1958BBC
UK Biobank	sUK2	1243	12390	13633
ARIC	sUSA	1110	9710	10820
GAIN
FIA
nonGAIN
HUNT Study	HUNT Study	443	31043	31486
total		7495	71934	79429
